# Supplementary material
Source: PubMed Central journal article supplement (PMC3298082)
Supplement: NIHMS360404-supplement-supplement_1.pdf [file NIHMS360404-supplement-supplement_1.pdf]

## SUPPLEMENTAL REFERENCES

### Reviews of the microbiota and microbiota-Immune Interactions

- Blaser, M. J. & Falkow, S. What are the consequences of the disappearing human microbiota? *Nat Rev Microbiol* 7, 887-894, (2009).
- Hooper, L. V. & Macpherson, A. J. Immune adaptations that maintain homeostasis with the intestinal microbiota. *Nat Rev Immunol* 10, 159-169, (2010).
- Lee, Y. K. & Mazmanian, S. K. Has the microbiota played a critical role in the evolution of the adaptive immune system? *Science* 330, 1768-1773, (2010).
- Maslowski, K. M. & Mackay, C. R. Diet, gut microbiota and immune responses. *Nat Immunol* 12, 5-9, (2011).
- Willing, B. P., Russell, S. L. & Finlay, B. B. Shifting the balance: antibiotic effects on host-microbiota mutualism. *Nat Rev Microbiol* 9, 233-243, (2011).

### Productivity-Diversity relationships in community structure

- Chase, J. M. & Leibold, M. A. Spatial scale dictates the productivity-biodiversity relationship. *Nature* 416, 427-430, (2002).
- Donohue, I., Jackson, A. L., Pusch, M. T. & Irvine, K. Nutrient enrichment homogenizes lake benthic assemblages at local and regional scales. *Ecology* 90, 3470-3477, (2009).

### Leptin-immune system interactions

- Caldefie-Chezet, F., Poulin, A. & Vasson, M. P. Leptin regulates functional capacities of polymorphonuclear neutrophils. *Free Radic Res* 37, 809-814, (2003).
- Ellacott, K. L. & Cone, R. D. The role of the central melanocortin system in the regulation of food intake and energy homeostasis: lessons from mouse models. *Phil Trans R Soc Lond B Biol Sci* 361, 1265-1274, (2006).
- Loffreda, S. *et al.* Leptin regulates proinflammatory immune responses. *FASEB J* 12, 57-65, (1998).
- Mancuso, P., Canetti, C., Gottschalk, A., Tithof, P. K. & Peters-Golden, M. Leptin augments alveolar macrophage leukotriene synthesis by increasing phospholipase activity and enhancing group IVC iPLA2 (cPLA2gamma) protein expression. *Am J Physiol: Lung Cell Mol Physiol* 287, L497-502, (2004).
- Mancuso, P. *et al.* Leptin-deficient mice exhibit impaired host defense in Gram-negative pneumonia. *J Immunol* 168, 4018-4024, (2002).
- Zarkesh-Esfahani, H. *et al.* Leptin indirectly activates human neutrophils via induction of TNF-alpha. *J Immunol* 172, 1809-1814, (2004).

### Metabolism and the immune system

- Angelini, G. *et al.* Antigen-presenting dendritic cells provide the reducing extracellular microenvironment required for T lymphocyte activation. *Proc Natl Acad Sci USA* 99, 1491-1496, (2002).
- Daynes, R. A. & Jones, D. C. Emerging roles of PPARs in inflammation and immunity. *Nat Rev Immunol* 2, 748-759, (2002).
- Haxhinasto, S., Mathis, D. & Benoist, C. The AKT-mTOR axis regulates de novo differentiation of CD4+Foxp3+ cells. *J Exp Med* 205, 565-574, (2008).
- Sinclair, L. V. *et al.* Phosphatidylinositol-3-OH kinase and nutrient-sensing mTOR pathways control T lymphocyte trafficking. *Nat Immunol* 9, 513-521, (2008).
- Delgoffe, G. M. *et al.* The mTOR kinase differentially regulates effector and regulatory T cell lineage commitment. *Immunity* 30, 832-844, (2009).
- Lee, K. *et al.* Mammalian target of rapamycin protein complex 2 regulates differentiation of Th1 and Th2 cell subsets via distinct signaling pathways. *Immunity* 32, 743-753, (2010).

- Gulen, M. F. *et al.* The receptor SIGIRR suppresses Th17 cell proliferation via inhibition of the interleukin-1 receptor pathway and mTOR kinase activation. *Immunity* 32, 54-66, (2010).
- Griffiths, M. & Keast, D. The effect of glutamine on murine splenic leukocyte responses to T and B cell mitogens. *Immunol Cell Biol* 68 ( Pt 6), 405-408, (1990).
- Munn, D. H. *et al.* Prevention of allogeneic fetal rejection by tryptophan catabolism. *Science* 281, 1191-1193, (1998).
- Rodriguez, P. C. *et al.* Arginase I production in the tumor microenvironment by mature myeloid cells inhibits T-cell receptor expression and antigen-specific T-cell responses. *Cancer Res* 64, 5839-5849, (2004).
- Srivastava, M. K., Sinha, P., Clements, V. K., Rodriguez, P. & Ostrand-Rosenberg, S. Myeloid-derived suppressor cells inhibit T-cell activation by depleting cystine and cysteine. *Cancer Res* 70, 68-77, (2010).
- Zheng, Y., Delgoffe, G. M., Meyer, C. F., Chan, W. & Powell, J. D. Anergic T cells are metabolically anergic. *J Immunol* 183, 6095-6101, (2009).
- Peng, L., He, Z., Chen, W., Holzman, I. R. & Lin, J. Effects of butyrate on intestinal barrier function in a Caco-2 cell monolayer model of intestinal barrier. *Pediatr Res* 61, 37-41, (2007).
- Peng, L., Li, Z. R., Green, R. S., Holzman, I. R. & Lin, J. Butyrate enhances the intestinal barrier by facilitating tight junction assembly via activation of AMP-activated protein kinase in Caco-2 cell monolayers. *J Nutr* 139, 1619-1625, (2009).

#### **Micronutrient interactions with the immune system and microbiota**

- Benson, M. J., Pino-Lagos, K., Roseblatt, M. & Noelle, R. J. All-trans retinoic acid mediates enhanced T reg cell growth, differentiation, and gut homing in the face of high levels of co-stimulation. *J Exp Med* 204, 1765-1774, (2007).
- Coomes, J. L. *et al.* A functionally specialized population of mucosal CD103+ DCs induces Foxp3+ regulatory T cells via a TGF-beta and retinoic acid-dependent mechanism. *J Exp Med* 204, 1757-1764, (2007).
- Sun, C. M. *et al.* Small intestine lamina propria dendritic cells promote de novo generation of Foxp3 T reg cells via retinoic acid. *J Exp Med* 204, 1775-1785, (2007).
- Mucida, D. *et al.* Reciprocal TH17 and regulatory T cell differentiation mediated by retinoic acid. *Science* 317, 256-260, (2007).
- Omara, F. O. & Blakley, B. R. The effects of iron deficiency and iron overload on cell-mediated immunity in the mouse. *Br J Nutr* 72, 899-909, (1994).
- Omara, F. O. & Blakley, B. R. The IgM and IgG antibody responses in iron-deficient and iron-loaded mice. *Biol Trace Elem Res* 46, 155-161, (1994).
- Reddy, B. S., Pleasants, J. R., Zimmerman, D. R. & Wostmann, B. S. Iron and copper utilization in rabbits as affected by diet and germfree status. *J Nutr* 87, 189-196, (1965).
- Reddy, B. S. Studies on the mechanism of calcium and magnesium absorption in germfree rats. *Arch Biochem Biophys* 149, 15-21, (1972).

#### **Diet, obesity, the microbiota, inflammation and metabolic dysfunction**

- Walker, A. W. *et al.* Dominant and diet-responsive groups of bacteria within the human colonic microbiota. *ISME J* 5, 220-230, (2011).
- Atarashi, K. *et al.* Induction of colonic regulatory T cells by indigenous Clostridium species. *Science* 331, 337-341, (2011).
- Carter, P. B. & Collins, F. M. The route of enteric infection in normal mice. *J Exp Med* 139, 1189-1203, (1974).
- Zhang, H. *et al.* Human gut microbiota in obesity and after gastric bypass. *Proc Natl Acad Sci USA* 106, 2365-2370, (2009).
- Nadal, I. *et al.* Shifts in Clostridia, Bacteroides and immunoglobulin-coating fecal

- bacteria associated with weight loss in obese adolescents. *Int J Obesity* 33, 758-767, (2009).
- Santacruz, A. *et al.* Interplay between weight loss and gut microbiota composition in overweight adolescents. *Obesity* 17, 1906-1915, (2009).
- Turnbaugh, P. J. *et al.* Organismal, genetic, and transcriptional variation in the deeply sequenced gut microbiomes of identical twins. *Proc Natl Acad Sci USA* 107, 7503-7508, (2010)
- Rabot, S. *et al.* Germ-free C57BL/6J mice are resistant to high-fat-diet-induced insulin resistance and have altered cholesterol metabolism. *FASEB J* 24, 4948-4959, (2010).
- Turnbaugh, P. J., Backhed, F., Fulton, L. & Gordon, J. I. Diet-induced obesity is linked to marked but reversible alterations in the mouse distal gut microbiome. *Cell Host Microbe* 3, 213-223, (2008).
- Cani, P. D. *et al.* Changes in gut microbiota control metabolic endotoxemia-induced inflammation in high-fat diet-induced obesity and diabetes in mice. *Diabetes* 57, 1470-1481, (2008).
- Cani, P. D. *et al.* Selective increases of Bifidobacteria in gut microflora improve high-fat-diet-induced diabetes in mice through a mechanism associated with endotoxaemia. *Diabetologia* 50, 2374-2383, (2007).
- Ding, S. *et al.* High-fat diet: bacteria interactions promote intestinal inflammation which precedes and correlates with obesity and insulin resistance in mouse. *PLoS One* 5, e12191, (2010).
- Reigstad, C. S., Lunden, G. O., Felin, J. & Backhed, F. Regulation of serum amyloid A3 (SAA3) in mouse colonic epithelium and adipose tissue by the intestinal microbiota. *PLoS One* 4, e5842, (2009).
- Membrez, M. *et al.* Gut microbiota modulation with norfloxacin and ampicillin enhances glucose tolerance in mice. *FASEB J* 22, 2416-2426, (2008).

#### *Inflammatory mechanisms in metabolic dysfunction*

- Aguirre, V., Uchida, T., Yenush, L., Davis, R. & White, M. F. The c-Jun NH(2)-terminal kinase promotes insulin resistance during association with insulin receptor substrate-1 and phosphorylation of Ser(307). *J Biol Chem* 275, 9047-9054, (2000).
- Gao, Z. *et al.* Serine phosphorylation of insulin receptor substrate 1 by inhibitor kappa B kinase complex. *J Biol Chem* 277, 48115-48121, (2002).
- Harrington, L. S. *et al.* The TSC1-2 tumor suppressor controls insulin-PI3K signaling via regulation of IRS proteins. *J Cell Biol* 166, 213-223, (2004).
- Liu, Y. F. *et al.* Insulin stimulates PKC $\zeta$ -mediated phosphorylation of insulin receptor substrate-1 (IRS-1). A self-attenuated mechanism to negatively regulate the function of IRS proteins. *J Biol Chem* 276, 14459-14465, (2001).
- Hotamisligil, G. S., Shargill, N. S. & Spiegelman, B. M. Adipose expression of tumor necrosis factor- $\alpha$ : direct role in obesity-linked insulin resistance. *Science* 259, 87-91, (1993).
- Kern, P. A. *et al.* The expression of tumor necrosis factor in human adipose tissue. Regulation by obesity, weight loss, and relationship to lipoprotein lipase. *J Clin Invest* 95, 2111-2119, (1995).
- Kanda, H. *et al.* MCP-1 contributes to macrophage infiltration into adipose tissue, insulin resistance, and hepatic steatosis in obesity. *J Clin Invest* 116, 1494-1505, (2006).
- Kintscher, U. *et al.* T-lymphocyte infiltration in visceral adipose tissue: a primary event in adipose tissue inflammation and the development of obesity-mediated insulin resistance. *Arterioscler Thromb Vasc Biol* 28, 1304-1310, (2008).
- Nishimura, S. *et al.* CD8<sup>+</sup> effector T cells contribute to macrophage recruitment and adipose tissue inflammation in obesity. *Nat Med* 15, 914-920, (2009).
- Shah, O. J., Wang, Z. & Hunter, T. Inappropriate activation of the

TSC/Rheb/mTOR/S6K cassette induces IRS1/2 depletion, insulin resistance, and cell survival deficiencies. *CurrBiol* 14, 1650-1656, (2004).

Rausch, M. E., Weisberg, S., Vardhana, P. & Tortoriello, D. V. Obesity in C57BL/6J mice is characterized by adipose tissue hypoxia and cytotoxic T-cell infiltration. *Int J Obesity* 32, 451-463, (2008).

### **Microbiota Assembly**

Dominguez-Bello, M. G. *et al.* Delivery mode shapes the acquisition and structure of the initial microbiota across multiple body habitats in newborns. *Proc Natl Acad Sci USA* 107, 11971-11975, (2010).

Palmer, C., Bik, E. M., DiGiulio, D. B., Relman, D. A. & Brown, P. O. Development of the human infant intestinal microbiota. *PLoS Biol* 5, e177, (2007).

Hansen, E. E. *et al.* Pan-genome of the dominant human gut-associated archaeon, *Methanobrevibacter smithii*, studied in twins. *Proc Natl Acad Sci USA* 108, 4599-4606, (2011).

Zivkovic, A. M., German, J. B., Lebrilla, C. B. & Mills, D. A. Human milk glyco-biome and its impact on the infant gastrointestinal microbiota. *Proc Nat Acad Sci USA* 108, 4653-4658, (2011).

Fuhrer, A. *et al.* Milk sialyllactose influences colitis in mice through selective intestinal bacterial colonization. *J Exp Med* 207, 2843-2854, (2010).

Stevens, C. R. *et al.* Antibacterial properties of xanthine oxidase in human milk. *Lancet* 356, 829-830, (2000).

Jelliffe, D. B. & Jelliffe, E. F. Breast milk and infection. *Lancet* 2, 419, (1981).

### **Long-term consequences of pre- and perinatal malnutrition**

Barker, D. J. Adult consequences of fetal growth restriction. *ClinObstetGynecol* 49, 270-283, (2006).

Barker, D. J. *et al.* Fetal nutrition and cardiovascular disease in adult life. *Lancet* 341, 938-941, (1993).

Barker, D. J. & Martyn, C. N. The maternal and fetal origins of cardiovascular disease. *J Epidemiol Community Health* 46, 8-11, (1992).

Williams, S., St George, I. M. & Silva, P. A. Intrauterine growth retardation and blood pressure at age seven and eighteen. *J Clin Epidemiol* 45, 1257-1263, (1992).

Dewey, K. G. Energy and protein requirements during lactation. *Annu Rev Nutr* 17, 19-36, (1997).

Dewey, K. G. & Adu-Afarwuah, S. Systematic review of the efficacy and effectiveness of complementary feeding interventions in developing countries. *Matern Child Nutr* 4 Suppl 1, 24-85, (2008).

### **Malnutrition and Infection**

Scrimshaw, N. S. Historical concepts of interactions, synergism and antagonism between nutrition and infection. *J Nutr* 133, 316S-321S, (2003).

Scrimshaw, N. S., Taylor, C. E. & Gordon, J. E. Interactions of nutrition and infection. *Am J Med Sci* 237, 367-403, (1959).

Scrimshaw, N. S., Taylor, C. E. & Gordon, J. E. Interactions of nutrition and infection. *Monogr Ser World Health Organ* 57, 3-329, (1968).

Weisz, A. *et al.* The duration of diarrhea and fever is associated with growth faltering in rural Malawian children aged 6-18 months. *Nutr J* 10, 25, (2011).
